# Supplementary material for: β-LacFamPred: An online tool for prediction and classification of β-lactamase class, subclass, and family
Source: Front Microbiol. 2023 Jan 12;13:1039687. doi: 10.3389/fmicb.2022.1039687 (PMC9878453; doi:10.3389/fmicb.2022.1039687)
Supplement: Supplementary file 2 [file Table_1.XLSX]

## Sheet: Table S1
Table S1: The detailed annotations of 96 profile HMMs of BLs Family
BL Family HMM Name	Class	Subclass	Gene Name	Antibiotic Resistant	Antibiotic Class	Definition	Family	Phenotype	Functional Information
BL:HMM:AST	A	NA	AST-1	Penam	Cephalosporin	NA	AST Beta-lactamase	NA	Broad spectrum
BL:HMM:BEL		NA	BEL, BEL-1, BEL-2, blaBEL-1,	Monobactam, Penam	Beta_lactam, Cephalosporin	class A extended-spectrum beta-lactamase	BEL Beta-lactamase	2be	ESBL
BL:HMM:BLAF		NA	blAF	Penam	Beta_lactam	NA	BLAF Beta-lactamase	NA	NA
BL:HMM:Blaz		NA	PC1, blaZ, bl2a_pc	Penam, Penicilin	Beta_lactam	BlaZ family penicillin-hydrolyzing class A beta-lactamase	BLAZ Beta-lactamase	NA	NA
BL:HMM:BPS		NA	NA	NA	NA	NA	BPS Beta-lactamase	NA	ESBL
BL:HMM:BRO		NA	blaBRO-1, BRO-1	NA	Beta_lactam	class A beta-lactamase	BRO Beta-lactamase	NA	NA
BL:HMM:CARB		NA	CARB, CARB-10, blaCARB-10, bl2c_bro, RTG-4	Carbenicillin, Penicillin, Penam	Beta_lactam	RTG family carbenicillin-hydrolyzing class A extended-spectrum beta-lactamase	CARB Beta-lactamase	2c	Broad spectrum
BL:HMM:CBLA		NA	CBLA, CBLA-1	NA	Beta_lactam, Cephalosporin	CblA family class A	CBLA Beta-lactamase	NA	NA
BL:HMM:CEPA		NA	CepA, CEPA	NA	Beta_lactam, Cephalosporin	CepA family class A extended-spectrum beta-lactamase	CEPA Beta-lactamase	2e	ESBL
BL:HMM:CFXA		NA	CfxA, CfxA2, bl2e_cfxa	Cephamycin	Beta_lactam, Cephalosporin	class A broad-spectrum beta-lactamase	CFXA Beta-lactamase	2e	ESBL
BL:HMM:CKO		NA	NA	NA	NA	NA	CKO Beta-lactamase	NA	Broad spectrum
BL:HMM:CME		NA	Cmec, Cme	Multi-drug resistance: Erythromycin, Glycylcycline, roxithromycin, fusidic acid	Multi-class: Macrolide antibiotic, cephalosporin, fluoroquinolone antibiotic	NA	CME Beta-lactamase	NA	ESBL
BL:HMM:CTXM		NA	CTX-M-15, bl2be_ctxm, CTX, blaCTX-M-139, blaCTXM-142, CTX-M-82, CTX-M-15	ceftazidime, Monobactam, Penicillin	Beta_lactam, Cephalosporin	Class A extended-spectrum beta-lactamase	CTXM Beta-lactamase	2be	ESBL
BL:HMM:FAR		NA	farA	NA	NA	antibacterial free fatty acids	FAR Beta-lactamase	NA	ESBL
BL:HMM:FONA		NA	FONA, blaFONA-3, blaFONA-6	ceftazidime, Monobactam, Penicillin	Beta_lactam, Cephalosporin	NA	FONA Beta-lactamase	NA	Broad spectrum
BL:HMM:GES		NA	GES-5, blaGES-3, GES	Penam	Beta_lactam, Carbapenam, Cephalosporin	MULTISPECIES: carbapenem-hydrolyzing class A beta-lactamase	GES Beta-lactamase	2f	ESBL
BL:HMM:HERA		NA	NA	Penam	Beta_lactam	penicillin-hydrolyzing class A beta-lactamase	HERA Beta-lactamase	NA	Broad spectrum
BL:HMM:IBC		NA	NA	NA	NA	NA	IBC Beta-lactamase	NA	NA
BL:HMM:IMI		NA	IMI-1, blaIM1-1, IM1-13, IMI	NA	Beta_lactam, Carbapenam	carbapenem-hydrolyzing class A beta-lactamase	IMI Beta-lactamase	2f	Carbapenemase
BL:HMM:KLUA/CTX-M-like β-lactamases		NA	NA	ceftazidime, Monobactam, Penicillin	Beta_lactam, Cephalosporin	class A extended-spectrum beta-lactamase	KLUA Beta-lactamase	2be	ESBL
BL:HMM:KLUC/CTX-M-like β-lactamases		NA	NA	NA	NA	NA	KLUC Beta-lactamase	NA	ESBL
BL:HMM:KLUY/CTX-M-like β-lactamases		NA	NA	NA	NA	NA	KLUY Beta-lactamase	NA	ESBL
BL:HMM:KPC		NA	NA	Monobactam, Penicillin	Beta_lactam, Carbapenam, Cephalosporin	MULTISPECIES: carbapenem-hydrolyzing class A beta-lactamase	KPC Beta-lactamase	2f	Carbapenemase
BL:HMM:LAP		NA	NA	NA	NA	NA	LAP Beta-lactamase	NA	Broad spectrum
BL:HMM:LEN		NA	LEN-18, bl2_len, LEN, blaLEN-17, blaLEN17	Penicillin, Penam	Beta_lactam	NA	LEN Beta-lactamase	NA	Broad spectrum
BL:HMM:LUT		NA	NA	NA	NA	NA	LUT Beta-lactamase	NA	Broad spectrum
BL:HMM:MAL		NA	NA	NA	NA	NA	MAL Beta-lactamase	NA	Broad spectrum
BL:HMM:NMC		NA	NMC-A	Cephamycin, Penam	Beta_lactam, Carbapenam, Cephalosporin	carbapenem-hydrolyzing class A beta-lactamase	NMC Beta-lactamase	2f	Carbapenemase
BL:HMM:OKP		NA	OKP-A-3, bl2a_okp, OKP, blaOKP-A-3, OKP-A, OKP-A-3	Penicillin, Penam	Beta_lactam, Cephalosporin	MULTISPECIES: class A broad-spectrum beta-lactamase	OKP Beta-lactamase	NA	Broad spectrum
BL:HMM:ORN		NA	NA	NA	NA	NA	ORN Beta-lactamase	2be	Broad spectrum
BL:HMM:OXY		NA	OXY-5-1, bl2be_oxy_1, OXY, blaOXY5-1, OXY-5	Monobactam, Penicillin, Penam	Beta_lactam, Carbapenam, Cephalosporin	MULTISPECIES: class A extended-spectrum beta-lactamase	OXY Beta-lactamase	NA	ESBL
BL:HMM:PENA		NA	NA	NA	NA	NA	PENA Beta-lactamase	NA	Carbapenemase
BL:HMM:PER		NA	PER-7, PER, blaPER-8, blaPER-7	Monobactam, Penam	Beta_lactam, Carbapenam, Cephalosporin	class A extended-spectrum beta-lactamase	PER Beta-lactamase	2be	ESBL
BL:HMM:PLA		NA	blaPLA2a	NA	Beta_lactam	NA	PLA Beta-lactamase	2be	Broad spectrum
BL:HMM:PSE		NA	bl2c_pse1, PSE-1	carbenicillin, penicillin, Penam	Beta_lactam	PSE family carbenicillin-hydrolyzing class A	PSE Beta-lactamase	NA	NA
BL:HMM:RAHN		NA	RAHN, blaRAHN-1, RAHN-1	NA	Beta_lactam	class A extended-spectrum beta-lactamase	RAHN Beta-lactamase	NA	ESBL
BL:HMM:ROB		NA	ROB-1, ROB, blaROB-1	Penam, Penicilin	Beta_lactam, Cephalosporin	MULTISPECIES: cephalosporin-hydrolyzing class A beta-lactamase	ROB Beta-lactamase	NA	Broad spectrum
BL:HMM:RTG		NA	NA	NA	NA	NA	RTG Beta-lactamase	NA	NA
BL:HMM:SCO		NA	NA	NA	NA	NA	SCO Beta-lactamase	NA	Broad spectrum
BL:HMM:SFO		NA	NA	NA	NA	NA	SFO Beta-lactamase	NA	ESBL
BL:HMM:SHV		NA	SHV-12, bl2be_shv2_ SHV, blaSHV-5, blaSHV-66	Monobactam, Penicillin, Penam	Beta_lactam, Carbapenam, Cephalosporin	NA	SHV Beta-lactamase	2b, 2be 2br	ESBL & Broad spectrum
BL:HMM:SME		NA	SME-1, SME, blaSME-1	NA	Beta_lactam, Carbapenam	carbapenem-hydrolyzing class A beta-lactamase	SME Beta-lactamase	2f	Carbapenemase
BL:HMM:TEM		NA	TEM-1, blaTEM-1D, TEM-234, TEM	Monobactam, Penam	Beta_lactam, Cephalosporin	class A beta-lactamase	TEM Beta-lactamase	2b, 2be, 2br, 2ber	ESBL & Broad spectrum
BL:HMM:TER		NA	blaTER-1	NA	Beta_lactam	NA	TER Beta-lactamase	2b	NA
BL:HMM:TLA		NA	TLA-1, TLA, blaTLA-1	Monobactam, Penam	Cephalosporin, fluoroquinolone antibiotic, Beta_lactam	class A extended-spectrum beta-lactamase	TLA Beta-lactamase	NA	ESBL
BL:HMM:TOHO/CTX-M-like β-lactamases		NA	NA	NA	NA	NA	TOHO Beta-lactamase	NA	NA
BL:HMM:VEB		NA	VEB-9, VEB, VEB-14, blaVEB-1	Monobactam	Cephalosporin, Beta_lactam	NA	VEB Beta-lactamase	2be	ESBL
BL:HMM:ARL		NA	arlR	Penam, acridine dye, Multi-drug resistance	Fluoroquinolone antibiotic	NA	ARL Beta-lactamase	NA	NA
BL:HMM:AXC		NA	EXO	penam	NA	NA	AXC Beta-lactamase	NA	Carbapenemase
BL:HMM:BcI		NA	BcI, bl2a_iii, Bla1	penam, Penicillin	Beta_lactam, Cephalosporin	class A beta-lactamase	BCI Beta-lactamase	NA	NA
BL:HMM:CRH		NA	KPC-2	monobactam, penam	carbapenem, cephalosporin	class A beta-lactamase	CRH Beta-lactamase	NA	Carbapenemase
BL:HMM:FRI		NA	NmcA	cephamycin, penam	carbapenem, cephalosporin	NA	FRI Beta-lactamase	NA	Carbapenemase
BL:HMM:L2		NA	NA	NA	NA	NA	L2 Beta-lactamase	2e	ESBL
BL:HMM:PAL		NA	CARB-1	penam	NA	NA	PAL Beta-lactamase	NA	NA
BL:HMM:PC1		NA	bl2a_pc, BlaZ	penam, Penicillin	beta-lactam	penicillin-hydrolyzing class A beta-lactamase	PC1 Beta-lactamase	2a	Narrow Spectrum
BL:HMM:PENB		NA	NA	NA	NA	NA	PENB Beta-lactamase	NA	Broad Spectrum
BL:HMM:PLES		NA	CARB-3	penam	NA	NA	PLES beta-lactamase	NA	NA
BL:HMM:SDA		NA	NA	NA	NA	NA	SDA beta-lactamase	NA	Broad Spectrum
BL:HMM:SGM		NA	KPC-2	monobactam, penam	carbapenem, cephalosporin, aminoglycoside	NA	SGM beta-lactamase	NA	ESBL
BL:HMM:XCC		NA	CTX-M-1	NA	cephalosporin	NA	XCC beta-lactamase	NA	NA
BL:HMM:CfiA	B	B1	CcrA	NA	carbapenem	NA	CfiA beta-lactamase	3a	NA
BL:HMM:Blab			BLAB, blaB-1, blaB-11, blaB, Blab-1	NA	Beta_lactam, Carbapenam	MULTISPECIES: subclass B1 metallo-beta-lactamase	BlaB beta-lactamase	NA	Carbapenemase
BL:HMM:DIM			DIM, DIM-1, blaDIM-1	NA	Beta_lactam, Carbapenam, Cephalosporin	MULTISPECIES: subclass B1 metallo-beta-lactamase	DIM beta-lactamase	NA	Carbapenemase
BL:HMM:GIM			GIM-2, GIM, blaGIM-2, blaGIM-1, GIM-1	Cephamycin, Penam, Monobactam	Beta_lactam, Carbapenam, Cephalosporin	subclass B1 metallo-beta-lactamase	GIM beta-lactamase	NA	Carbapenemase
BL:HMM:IMP			IMP-30, bl3_imp, IMP, blaIMP-39, blaIMP-1, IMP-1	Cephamycin, Penam, Monobactam, Penicillin	Beta_lactam, Carbapenam, Cephalosporin	MULTISPECIES: subclass B1 metallo-beta-lactamase	IMP beta-lactamase	3a	Carbapenemase
BL:HMM:IND			IND-1, IND, blaIND-7, blaIND-1	NA	Beta_lactam, Carbapenam	subclass B1 metallo-beta-lactamase	IND beta-lactamase	3a	NA
BL:HMM:NDM			NDM-1, NDM-4, blaNDM-1, NDM-23, NDM	Cephamycin, Penam	Beta_lactam, Carbapenam, Cephalosporin	subclass B1 metallo-beta-lactamase	NDM beta-lactamase	3a	Carbapenemase
BL:HMM:SIM			blaSIM-1, SIM-1	Penam	Beta_lactam, Carbapenam, Cephalosporin	MULTISPECIES: subclass B1 metallo-beta-lactamase	SIM beta-lactamase	NA	Carbapenemase
BL:HMM:TMB			TMB-1, blaTMB-1	Cephamycin	Beta_lactam, Carbapenam, Cephalosporin	MULTISPECIES: subclass B1 metallo-beta-lactamase	TMB beta-lactamase	NA	Carbapenemase
BL:HMM:VIM			VIM-1, blaVIM-1, VIM-59, VIM	Cephamycin, Penam	Beta_lactam, Carbapenam, Cephalosporin	subclass B1 metallo-beta-lactamase	VIM beta-lactamase	3a	Carbapenemase
BL:HMM:CPHA		B2	cphA6, bl3_cpha, CPHA	Cephamycin, Penicillin	Beta_lactam, Carbapenam, Cephalosporin	subclass B2 metallo-beta-lactamase	CphA beta-lactamase	3b	NA
BL:HMM:GOB		B3	GOB-1, blaGOB-8, GOB	Penam	Beta_lactam, Carbapenam, Cephalosporin	subclass B3 metallo-beta-lactamase	GOB beta-lactamase	3a	NA
BL:HMM:L1			L1B3 , L1	NA	Beta_lactam	L1 family subclass B3 metallo-beta-lactamase	L1 family beta-lactamase	3a	NA
BL:HMM:LRA			LRA-1, blaLRA-1	Penam	Beta_lactam, Cephalosporin	subclass B3 beta-lactamase	LRA beta-lactamase	NA	NA
BL:HMM:BJP			BJP-1	NA	carbapenem	subclass B3 beta-lactamase	BJP beta-lactamase	NA	NA
BL:HMM:ACC	C	NA	ACC-1, bl1_acc_ blaACC-1	Penicillin, Penam, Monobactam	Beta_lactam, Cephalosporin	NA	ACC beta-lactamase	1	NA
BL:HMM:ACT		NA	ACT-29, blaACT-6, ACT-49, ACT	Cephamycin, Penam	Beta_lactam, Carbapenam, Cephalosporin	MULTISPECIES: cephalosporin-hydrolyzing class C beta-lactamase	ACT beta-lactamase	1	NA
BL:HMM:Ampc		NA	ampC, bl1_ec, BLAEC, AmpC2	Penam	Beta_lactam, Cephalosporin	class C extended-spectrum beta-lactamase	ampC-type beta-lactamase	NA	NA
BL:HMM:CMY		NA	CMY-2, blaCMY-133, CMY-134, CMY	Cephamycin	Beta_lactam, Cephalosporin	class C beta-lactamase	CMY beta-lactamase	1 and 1e	NA
BL:HMM:DHA		NA	DHA-1, DHA-6, blaDHA-1, DHA-26, DHA	Cephamycin	Beta_lactam, Cephalosporin	class C beta-lactamase	DHA beta-lactamase	1	NA
BL:HMM:FOX		NA	FOX-2, blaFOX-7, FOX-14, FOX	Cephamycin	Beta_lactam, Cephalosporin	MULTISPECIES: cephalosporin-hydrolyzing class C beta-lactamase	FOX beta-lactamase	1	NA
BL:HMM:LAT		NA	LAT-1, blaLAT-1	cephamycin, cefoxitin, ceftazidime,	Beta_lactam, Carbapenam, Cephalosporin	CMY-2 family cephalosporin-hydrolyzing class C beta-lactamase	LAT beta-lactamase	NA	NA
BL:HMM:MIR		NA	MIR-10, MIR, blaMIR-5, MIR-8	Monobactam	Beta_lactam, Cephalosporin	MULTISPECIES: cephalosporin-hydrolyzing class C beta-lactamase	MIR beta-lactamase	1	NA
BL:HMM:MOX		NA	MOX-1, bl1_mox, MOX, blaMOX-1	Cephamycin, Penam	Beta_lactam, Cephalosporin	MULTISPECIES: CMY-1/MOX family class C beta-lactamase	MOX beta-lactamase	NA	NA
BL:HMM:SRT		NA	bl1_sm, SRT, SRT-2	NA	Beta_lactam, Cephalosporin	NA	SRT beta-lactamase	NA	NA
BL:HMM:ADC		NA	ADC-2, ADC, blaADC-58, blaADC-25, ADC-105	NA	Beta_lactam, Cephalosporin	class C beta-lactamase	ADC beta-lactamase	NA	ESBL
BL:HMM:ESC		NA	NA	penam	cephalosporin	NA	ESC beta-lactamase	NA	NA
BL:HMM:PDC		NA	PDC, PDC-5, PDC 303	monobactam	carbapenem, cephalosporin	class C beta-lactamase	PDC beta-lactamase	NA	NA
BL:HMM:AQU		NA	AQU-1, AQU, blaAQU-2	NA	Beta_lactam, Cephalosporin	class C beta-lactamase	AQU beta-lactamase	NA	NA
BL:HMM:CDA		NA	NA	NA	NA	NA	CDA beta-lactamase	NA	NA
BL:HMM:CMH		NA	blaCMH-3, blaCMH-1	NA	Beta_lactam	NA	CMH beta-lactamase	NA	NA
BL:HMM:LHK		NA	NA	NA	NA	NA	LHK beta-lactamase	NA	NA
BL:HMM:OCH		NA	OCH-1, bl1_och, OCH, blaOCH-7	monobactam, cephamycin, penam, penem	cephalosporin	class C extended-spectrum beta-lactamase	OCH beta-lactamase	NA	NA
BL:HMM:SEC		NA	NA	NA	NA	NA	SEC beta-lactamase	NA	NA
BL:HMM:LCR	D	NA	LCR-1, bl2d_lcr1, blaLCR-1	cloxacillin, penicillin, Penam	Beta_lactam, Cephalosporin	oxacillin-hydrolyzing class D beta-lactamase	LCR beta-lactamase	NA	NA
BL:HMM:OXA		NA	OXA-10, bl2d_oxa10, OXA, blaOXA-10	cloxacillin, penicillin, Penam	Beta_lactam, Cephalosporin	MULTISPECIES: oxacillin-hydrolyzing class D beta-lactamase	OXA beta-lactamase	2d, 2de, 2df, 2def	Carbapenemase, ESBL, Narrow Spectrum
		NA denotes not available
